# Supplementary material for: Declining transition/transversion ratios through time reveal limitations to the accuracy of nucleotide substitution models
Source: PubMed Central journal article supplement (PMC4358783; doi:10.1186/s12862-015-0312-6), 2015-03-11
Supplement: 12862_2015_312_MOESM4_ESM.pdf [file 12862_2015_312_MOESM4_ESM.pdf]

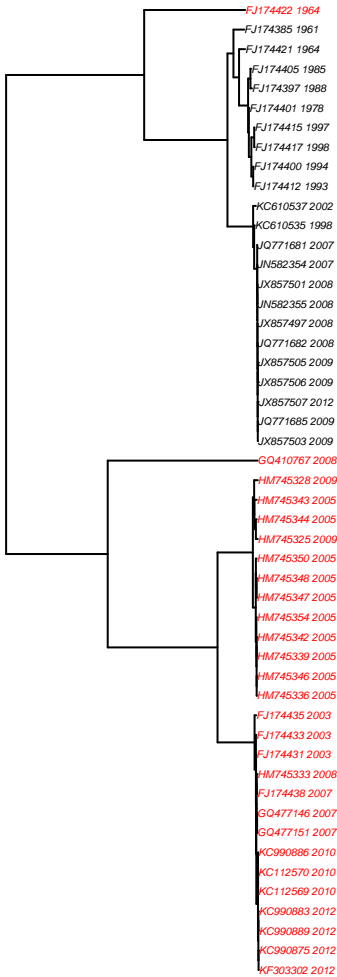

ASFV subsampled

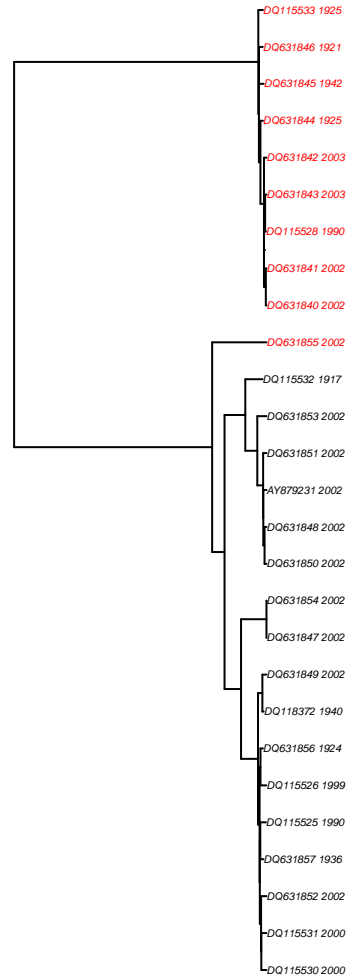

BYDV subsampled

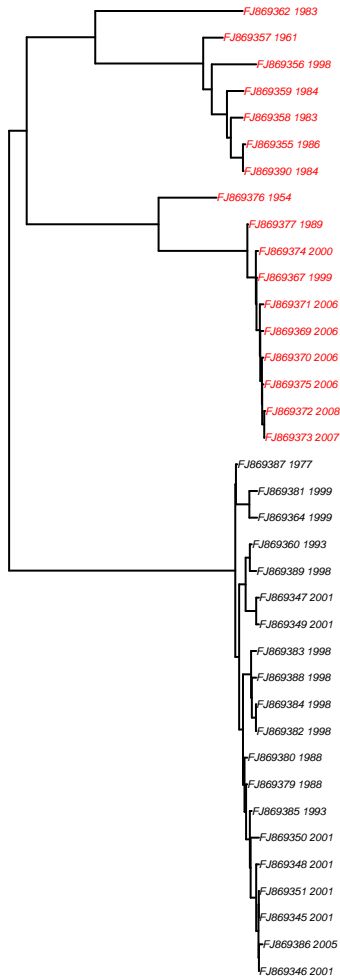

CaPV subsampled

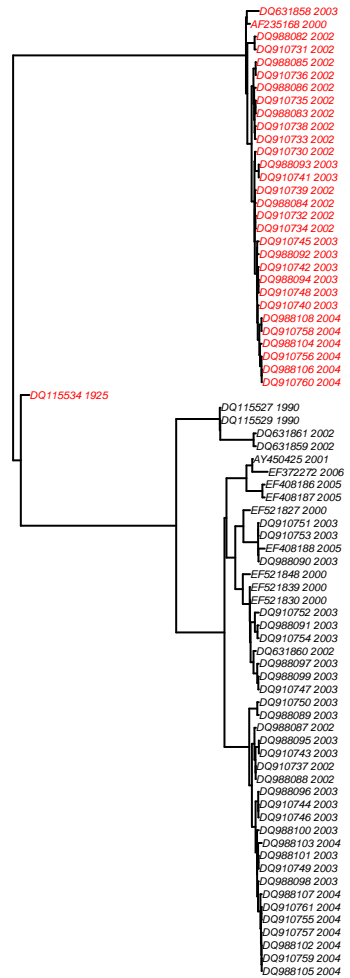

CYDV subsampled

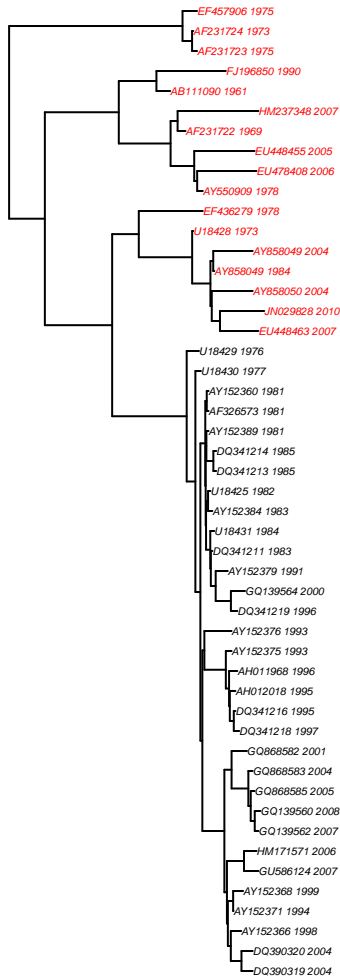

DENV-4 subsampled

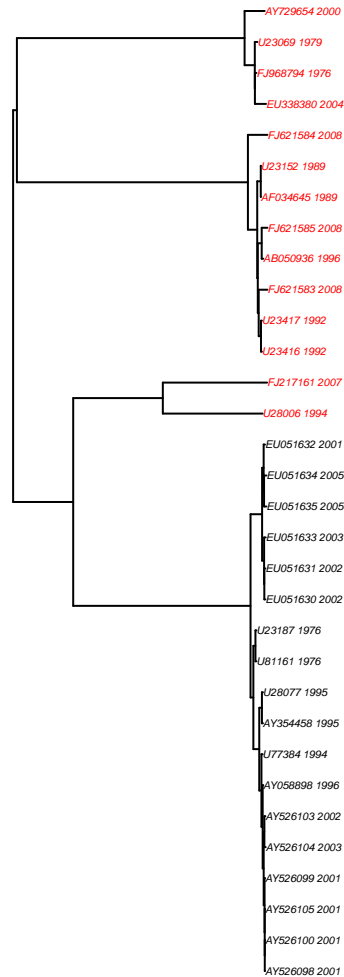

EBOV subsampled

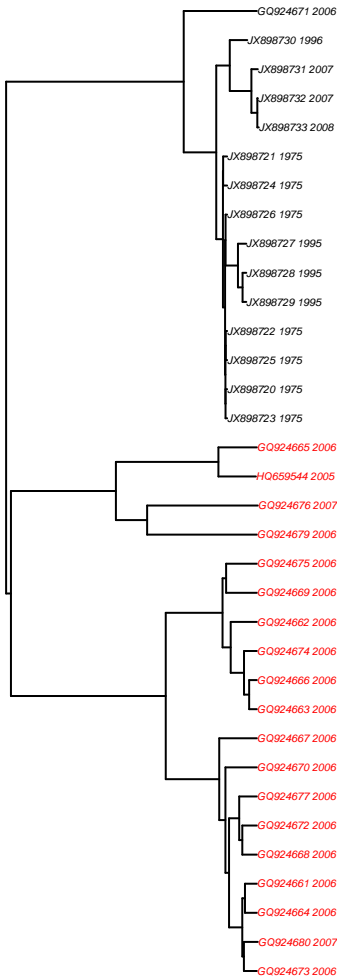

HBV subsampled

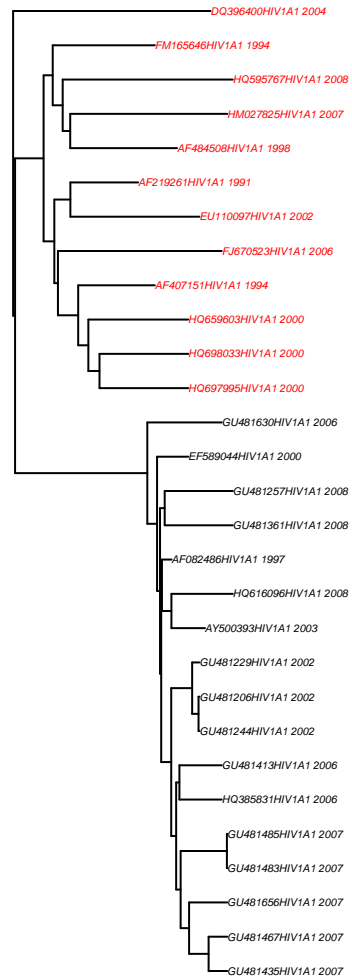

HIV-1 subsampled

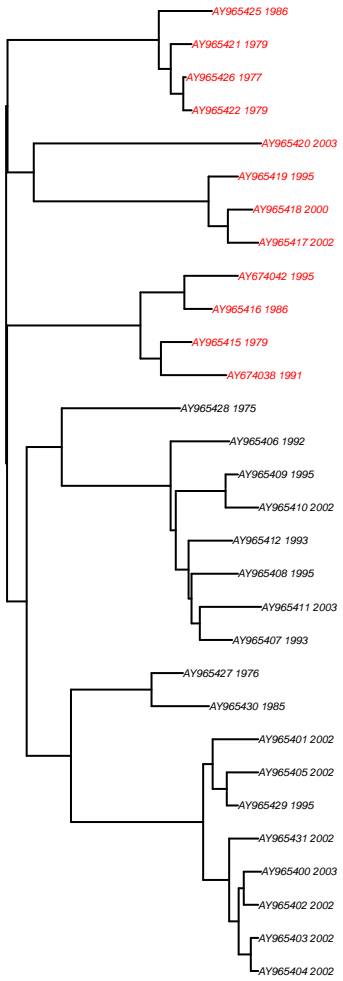

HIV-2+SIV subsampled

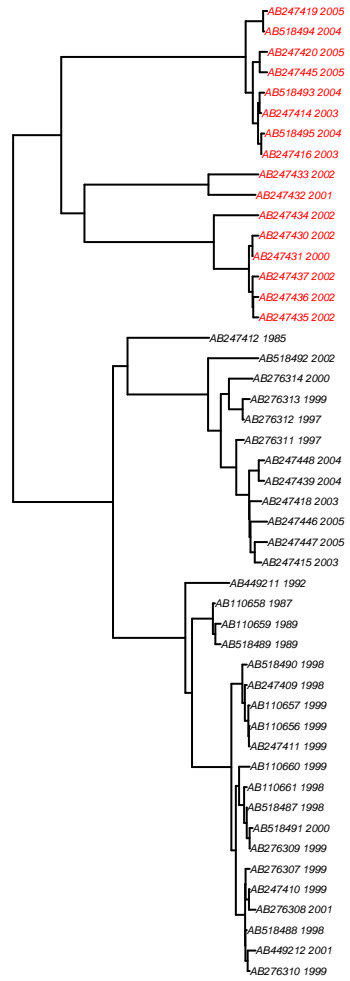

RABV subsampled
